# Supplementary material
Source: Royal Society of Chemistry journal article supplement (doi:10.1039/d5tb02592c)
Supplement: d5tb02592c1.pdf [file d5tb02592c1.pdf]

**Supporting Information for**  
**A Natural Deep Eutectic Solvent Formulation Promotes Hair**  
**Growth by Enhancing the Transdermal Delivery and Bioactivity of**  
**Hydroxytyrosol**

Yujia Xie <sup>a,1</sup>, Kan Zeng <sup>a,b,1</sup>, Puying Yang <sup>a</sup> Ting Zheng <sup>a</sup>, Xinlei Zhao <sup>a,b</sup>, Zhiai Hu <sup>a</sup>, Fan Li <sup>c</sup>,  
Ling Ye <sup>a,b</sup>, Ding Xiong <sup>a,\*</sup>, Zhenming Wang<sup>a,\*</sup>, Yu Shi <sup>a,\*</sup>

<sup>a</sup> State Key Laboratory of Oral Diseases and National Clinical Research Center for Oral Diseases,  
West China Hospital of Stomatology, Sichuan University, Chengdu, China

<sup>b</sup> West China Hospital of Stomatology, Sichuan University, Chengdu, China

<sup>c</sup> Department of Dermatology and Venereology, West China Hospital, Sichuan University,  
Chengdu, China

\* Corresponding author

<sup>1</sup> These authors contributed equally to this work

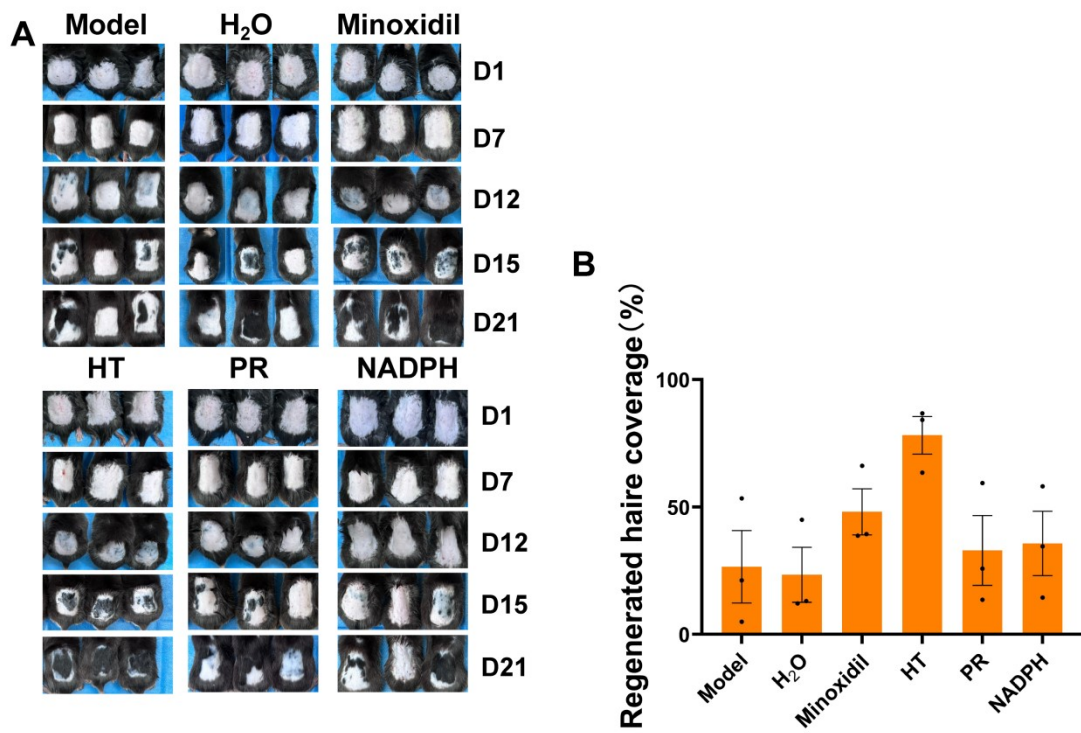

**Figure. S1 Effect of different antioxidative molecules on AGA model.** (A) Representative images of hair regeneration status in different groups of mice from 1-16 days. (B) Statistics of the regenerated hair coverage of mice on day 16 (n = 3 mice). Hydroxytyrosol (HT 10mg/ml), Puerarin (PR 10mg/ml), NADPH (10mg/ml)

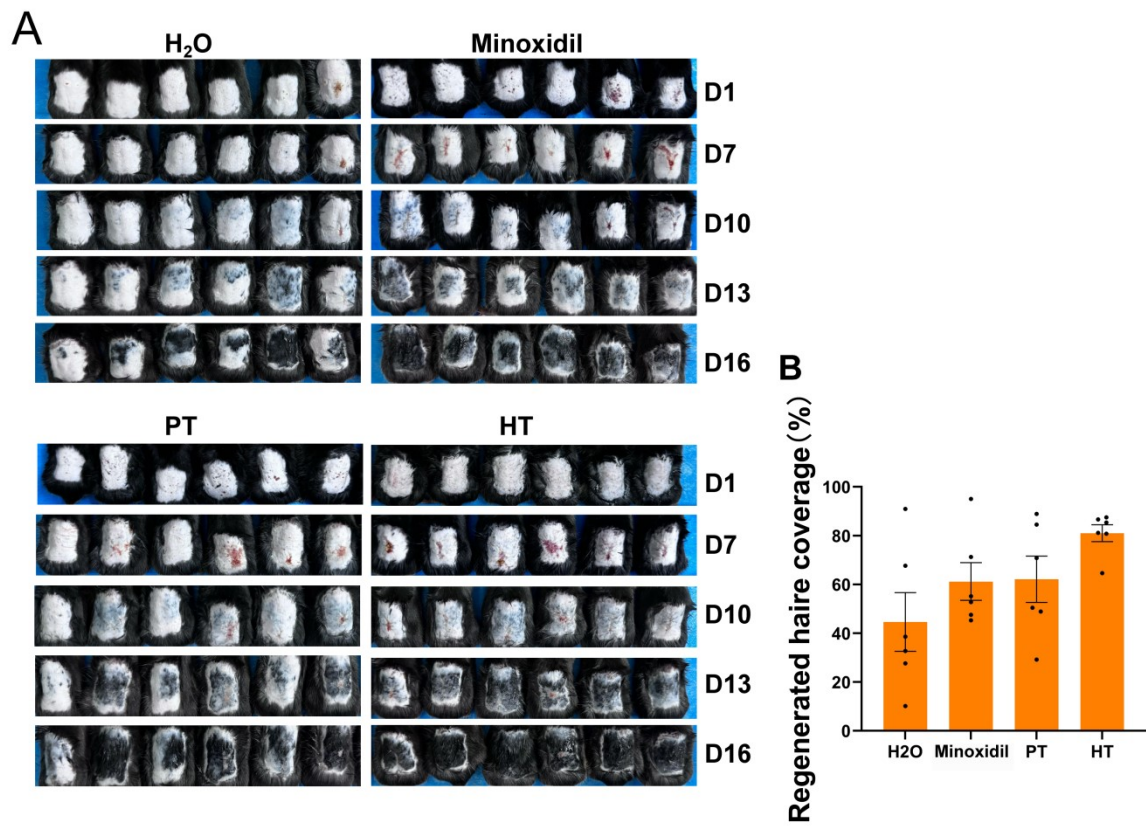

**Figure. S2 Effect of different antioxidative molecules on AGA.** (A) Representative images of hair regeneration status in different groups of mice from 1-16 days. (B) Statistics of the regenerated hair coverage of mice on day 16 (n = 5 mice). Hydroxytyrosol (HT 10mg/ml), Piceatannol(PT 10mg/ml).

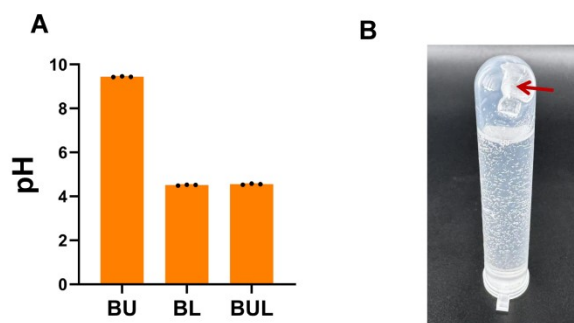

**Figure S3. Physicochemical properties of deep eutectic solvents (DES).** (A) pH of BU, BL, and BUL DESs at room temperature. (B) Crystal formation in DES-BL following 24-hour incubation at room temperature. Crystals are marked with red arrows.

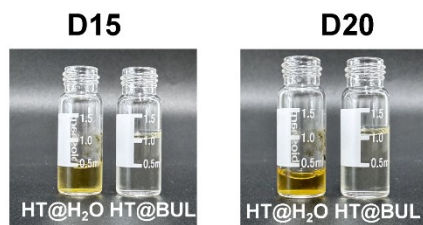

**Figure S4. Enhanced stability of HT by BUL.** Physical appearance of water and BUL-formulated HT samples following 15 and 20 days of outdoor exposure.

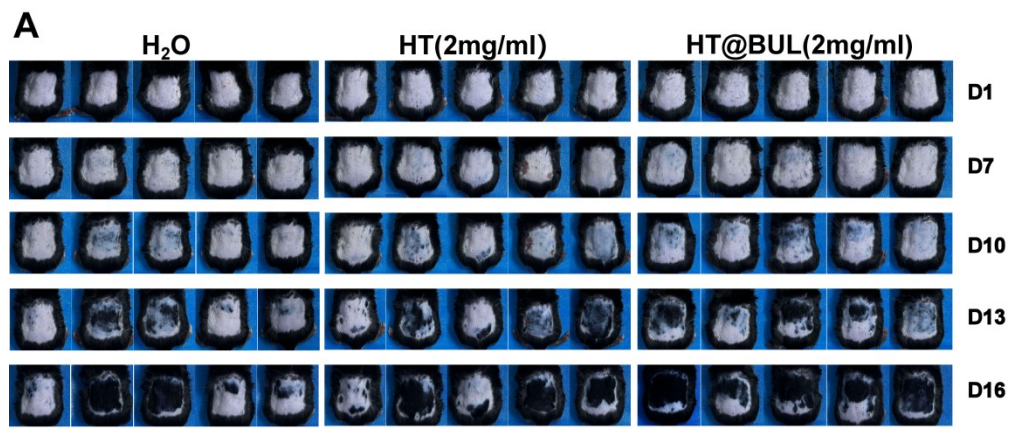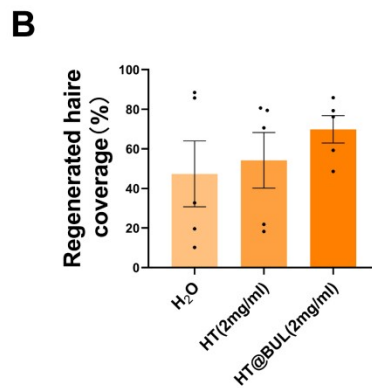

**Figure. S5** The effect of low-concentration HT loaded in BUL on AGA model. (A) Representative images of hair regeneration status in different groups of mice from 1-16 days. (B) Statistics of the regenerated hair coverage of mice on day 16 (n = 5 mice)

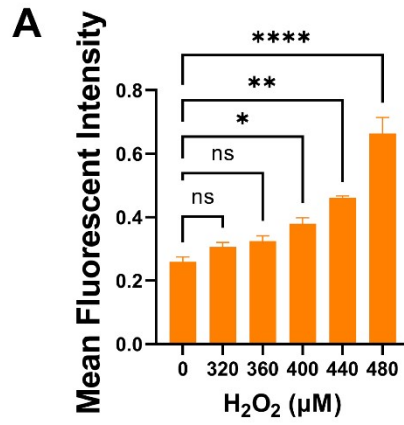

**Figure S6A. H<sub>2</sub>O<sub>2</sub>-dependent induction of oxidative stress in HDPCs.** (A) Dose-response curve of DHE fluorescence intensity in HDPCs following treatment with H<sub>2</sub>O<sub>2</sub> (n=3).
